# Supplementary material for: Factors Influencing Acceptance of Hippopotamus at a Large Reservoir in Nigeria
Source: MDPI journal article supplement (doi:10.3390/conservation2040043), 2022-10-27
Supplement: s1 [file s1]

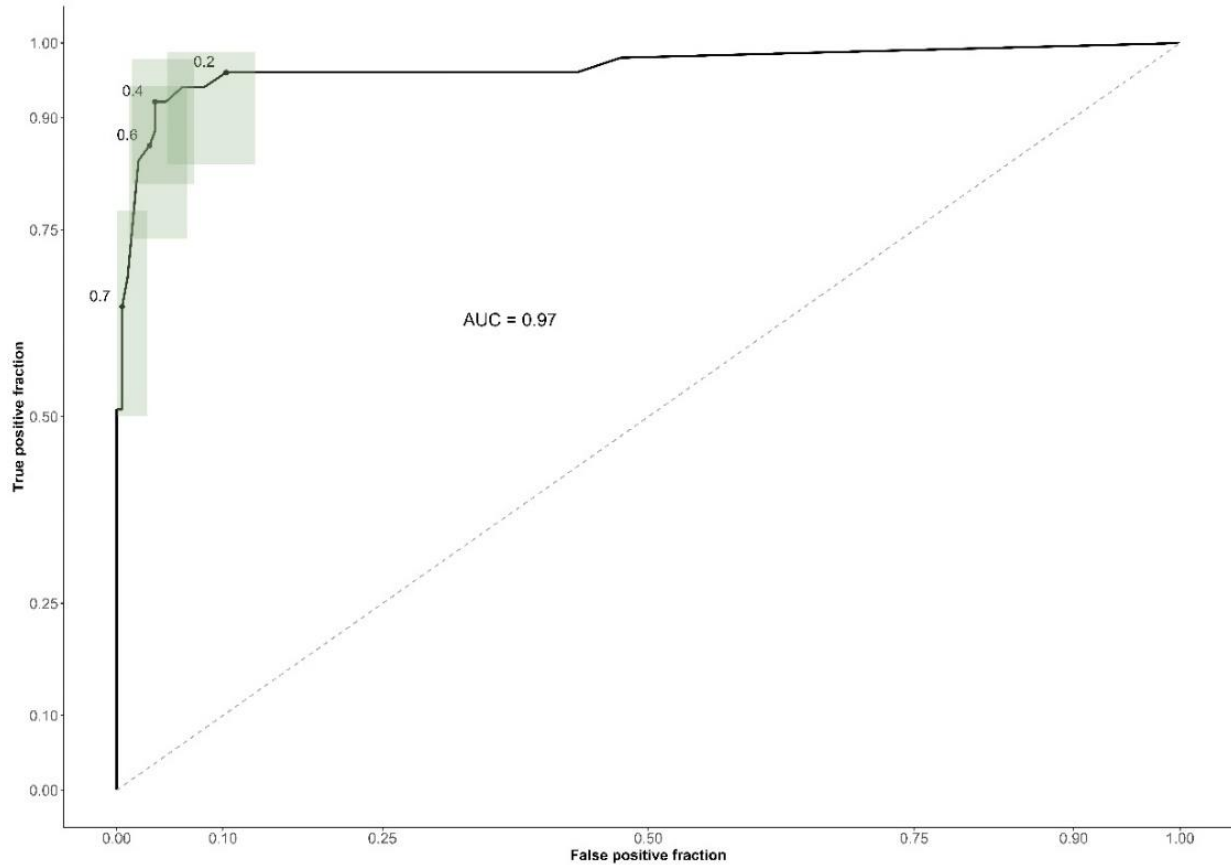

**Figure S1.** ROC Curve based on the best model of acceptance of hippos. Probability cut-off points are shown. AUC (area under the ROC curve) value = 0.97. Using a cut-off of 0.4, which reasonably optimized the false and true positive rates and intersection of the sensitivity and specificity curves, the model correctly classified 95.5% of observations. Sensitivity was 92%, and specificity was 96%.

# KIRI AREA HIPPOPOTAMOUS QUESTIONNAIRE

Village \_\_\_\_\_  
Ward \_\_\_\_\_  
Date \_\_\_\_\_  
Start \_\_\_\_\_ Stop \_\_\_\_\_

## **DEMOGRAPHIC DATA**

1) Age (years): \_\_\_\_\_

2) Gender: ☐ MALE (1) ☐ FEMALE (2)

3) Are you an indigene of this village? ☐ NO (1) ☐ YES (2)

*If NO*, how many years have you lived here? \_\_\_\_\_

4) Currently married: ☐ NO (1) ☐ YES (2)

5) How many children *currently living* do you have? \_\_\_\_\_

6) How many people live in your household, INCLUDING YOU? \_\_\_\_\_

7) Religion: ☐ ISLAM (1) ☐ CHRISTIANITY (2) ☐ Other: \_\_\_\_\_

8) What languages do you speak? (**TICK ALL THAT APPLY**)

☐ HAUSA ☐ FULFUDE ☐ ENGLISH ☐ BURA/BABUR  
☐ KANAKURU ☐ BARE ☐ JUKUN ☐ LUNGUDA

Other: \_\_\_\_\_

## **EDUCATION**

9) Did you go to school? NO (1) ☐ YES (2) ☐

10) Which class did you reach (*did you complete IN FULL*)?

☐ PRIMARY (1) ☐ JS (2) ☐ SS (3) ☐ TERTIARY (4)

Level successfully completed: PRIMARY / JUNIOR / SENIOR

1 2 3 4 5 6

## **OCCUPATION/CROPS**

11) Do you work to earn money? ☐ NO (1) ☐ YES (2)

12) *If YES, what do you do to earn money?* ☐ FARMING ☐ FISHING

☐ LIVESTOCK REARING ☐ HUNTING ☐ PETTY TRADING

☐ CIVIL SERVICE ☐ SKILL-BASED (CARPENTER, DRIVER, ETC.)

Other: \_\_\_\_\_

13) If *FARMING* is ticked in #12 above, which crops do you grow year-round (in any season, or at any time in a year)? **(TICK ALL THAT APPLY)**

☐ Rice   ☐ Maize   ☐ Guinea corn   ☐ Beans   ☐ Potato   ☐ Tomato  
☐ Millet   ☐ Ridi   Other: \_\_\_\_\_

14) If *FARMING* is ticked in #12 above, do you grow any crops at the dam (next to the water)?

☐ NO (1)   ☐ YES (2)

If *YES*, what crop(s) do you grow at the dam (next to the water)? **(TICK ALL THAT APPLY)**

☐ Rice   ☐ Maize   ☐ Guinea corn   ☐ Beans   ☐ Potato   ☐ Tomato  
☐ Millet   ☐ Ridi   Other: \_\_\_\_\_

## **HIPPOPOTAMOUS**

15) Do you know the animal called hippo – *DORINA* or *LIUYO* or *LIKIWE* / *LUKIWE*?

☐ NO (1)   ☐ YES (2)   ☐ DON'T KNOW (3)

► **NOTE: If NO or DON'T KNOW, conclude interview. If YES, continue to #16.**

16) Have you ever seen a hippo with your own eye?   ☐ NO (1)   ☐ YES (2)

17) **IN THE PAST 5 YEARS**, has the number of hippo in this area increased, decreased, or stayed the same?

☐ INCREASED (1)   ☐ DECREASED (2)   ☐ SAME (3)   ☐ DON'T KNOW (4)

18) Explain why you think this: \_\_\_\_\_

\_\_\_\_\_  
\_\_\_\_\_  
\_\_\_\_\_

19) Does the presence of hippo provide any benefits, or advantages, to the people in this area?

☐ NO (1)   ☐ YES (2)   ☐ DON'T KNOW (3)

20) If *YES*, what benefits, or advantages, do hippos provide? **(TICK ALL THAT APPLY)**

☐ INCREASE NUMBER OF FISH

☐ OTHER: \_\_\_\_\_

\_\_\_\_\_

21) Have you ever tasted the meat of hippo?

☐ NO (1)

☐ YES (2)

☐ DON'T KNOW (3)

22) IF YES, compared to other meat, such as cow or goat meat, does the meat of hippo taste less sweet, more sweet, or about the same?

☐ LESS SWEET (1)

☐ MORE SWEET (2)

☐ SAME (3)

23) Do hippos cause any problems to the people in this area?

☐ NO (1)

☐ YES (2)

☐ DON'T KNOW (3)

24) IF YES, what problems do they cause? (**TICK ALL THAT APPLY**)

☐ EAT/DAMAGE CROPS

☐ DISTURB FISHING ACTIVITIES

☐ DAMAGE FISHING NETS

☐ DAMAGE BOATS

☐ DISTURB WATER TRANSPORT

☐ INJURE OR KILL LIVESTOCK (DOMESTIC ANIMALS)

☐ INJURE OR KILL PEOPLE

☐ OTHER: \_\_\_\_\_

25) If EAT/DAMAGE CROPS is ticked above, which crops do hippos typically eat or damage? (**TICK ALL THAT APPLY**)

☐ Rice ☐ Maize ☐ Guinea corn ☐ Beans ☐ Potato ☐ Tomato

☐ Millet ☐ Ridi Other: \_\_\_\_\_

26) If EAT/DAMAGE CROPS is ticked above, at which time of the year do hippos cause the most damage to crops?

☐ Rainy season (1)

☐ Dry season (2)

☐ Year-round (3)

Which months? \_\_\_\_\_

27) If you see a hippo in your farm, or close to your home or boat, what do you do?

---

---

---

---

28) IN THE PAST 5 YEARS, how many hippos have been killed by local people? \_\_\_\_\_

29) What was the reason or reasons the hippo (or hippos) was killed? (**TICK ALL THAT APPLY**)

- ☐ HIPPO DESTROYED CROPS
- ☐ HIPPO DESTROYED FISHING NETS/BOATS
- ☐ KILLED OR INJURED SOMEONE / HIPPO IS DANGEROUS
- ☐ FOR FOOD/MEAT
- ☐ FOR LOCAL TRADITIONS/CUSTOMS (e.g., TO RECEIVE TITLE)
- ☐ TO USE THE HIDE/SKIN
- ☐ OTHER: \_\_\_\_\_

30) If a hippo is killed, what happens to the body? (**TICK ALL THAT APPLY**)

- ☐ FOOD – EATEN AS MEAT
- ☐ HIDE/SKIN USED TO MAKE WHIPS
- ☐ DISPLAY THE SKULL
- ☐ USE PARTS OF THE BODY FOR MEDICINE
- ☐ NOTHING
- ☐ OTHER: \_\_\_\_\_

### **CONSERVATION/PROTECTION**

31) *UNDER CURRENT CIRCUMSTANCES*, do you think hippos should be protected against killing and harassment in this area?

- ☐ NO (1)                      ☐ YES (2)                      ☐ DON'T KNOW (3)

*Please explain why or why not:* \_\_\_\_\_

---

---

---

---

32) According to government laws, is it legal or illegal to kill a hippo?

- ☐ LEGAL (1)                      ☐ ILLEGAL (2)                      ☐ DON'T KNOW (3)

33) Is any permission needed before someone can kill a hippo?

- ☐ NO (1)                      ☐ YES (2)                      ☐ DON'T KNOW (3)

If YES to #33 above, from whom or from where must the person get permission?

---

---

---

If YES to #33 above, if no permission is given and someone kills a hippo, will anything happen to the person?

☐ NO (1)

☐ YES (2)

☐ DON'T KNOW (3)

If YES, what will happen to the person?

---

---

---

**34) UNDER CURRENT CIRCUMSTANCES**, do you prefer hippos to be present or not present in this area?

☐ NOT PRESENT (1)

☐ PRESENT (2)

☐ DON'T CARE (3)

*Explain why:* \_\_\_\_\_

---

---

---

**OTHER COMMENTS/NARRATIVE:**

---

---

---

---

---

---

---

---

---

---
